# Supplementary material
Source: publisher site journal article supplement (https://www.dovepress.com/article/598598)
Supplement: Supplementary file 1 [file 598598%20Supplementary%20material.docx]

| Table S1. Subsequent Treatment Patterns After Capecitabine and Paclitaxel in the Post-CDK4/6 Inhibitor Setting | | |
| --- | --- | --- |
|  | Capecitabine (n = 44) | Paclitaxel (n=21) |
| Capecitabine | 0 | 11 (52.4%) |
| Paclitaxel | 29 (65.9%) | 0 |
| Everolimus + Exemestane | 10 (22.7%) | 5 (23.8%) |
| Fulvestrant | 4 (9.1%) | 3 (14.3%) |
| Platinum-based chemotherapy | 1 (2.3%) | 2 (9.5%) |
| Abbreviations: CDK4/6, cyclin-dependent kinase 4 and 6. | | |
